# Supplementary material for: Compact method of SARS-CoV-2 PCR detection enhances overall process of diagnosing Delta and Omicron variants
Source: Research Square preprint supplement (doi:10.21203/rs.3.rs-1483891/v1), 2022-04-15
Supplement: Supplementary file 1 [file 4dd14151e0c5f1974aee4c6e.docx]

Supplementary Material

Supplementary Figure 1. Sequence comparison of point mutations within various isolates of Delta and Omicron variants.

Supplementary Table 1. Primers and probes used for Delta and Omicron variants.
